# Supplementary material
Source: PubMed Central journal article supplement (PMC2946628)

Type of file: figure

Label: FigS1

Filename: MonsonFigS1.tif

# Figure S1

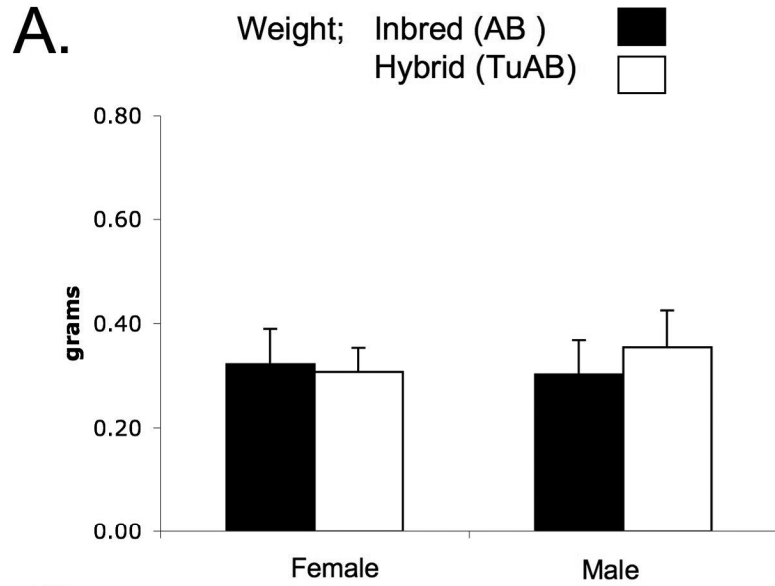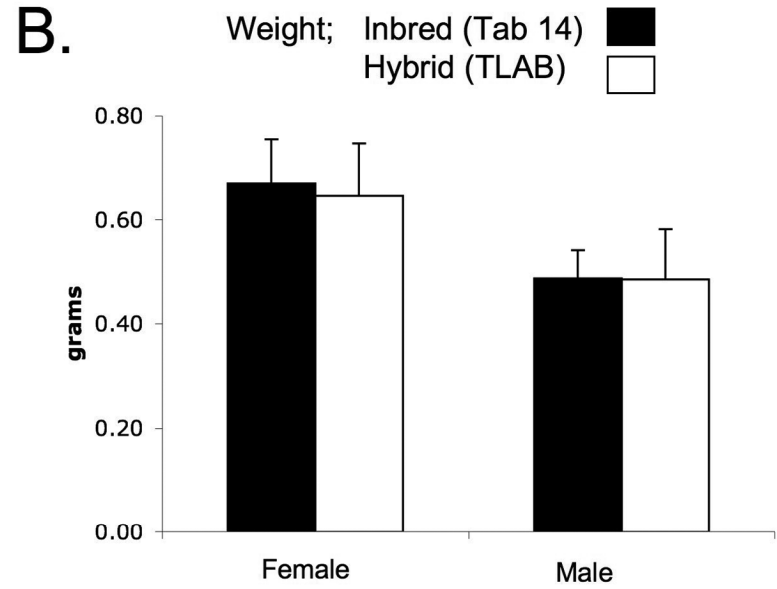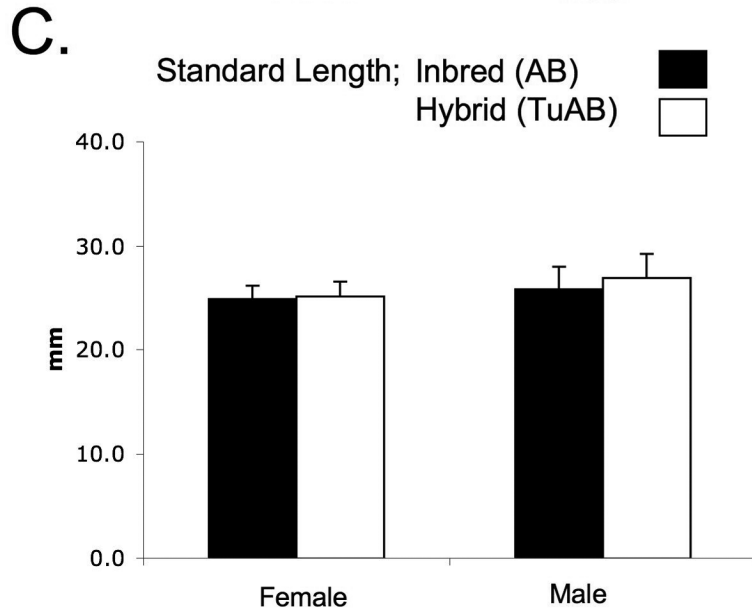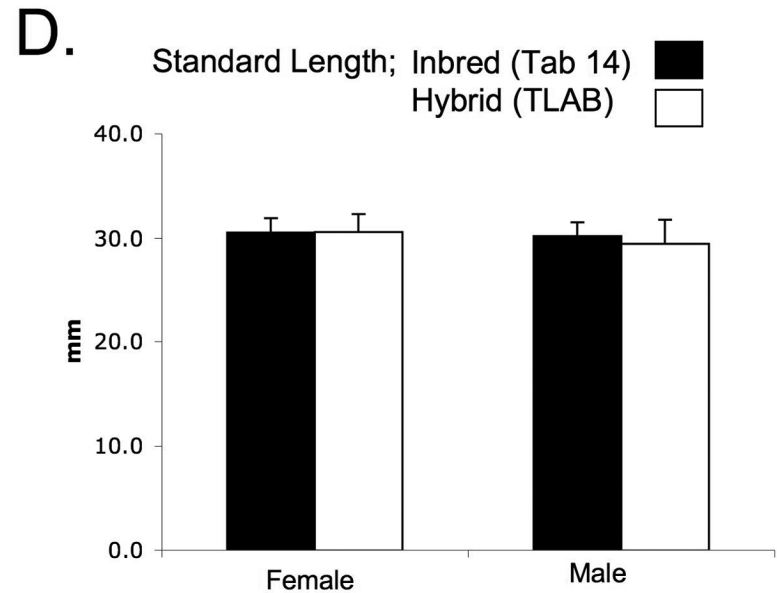

Type of file: figure

Label: FigS2

Filename: MonsonFigS2.tif

# Figure S2

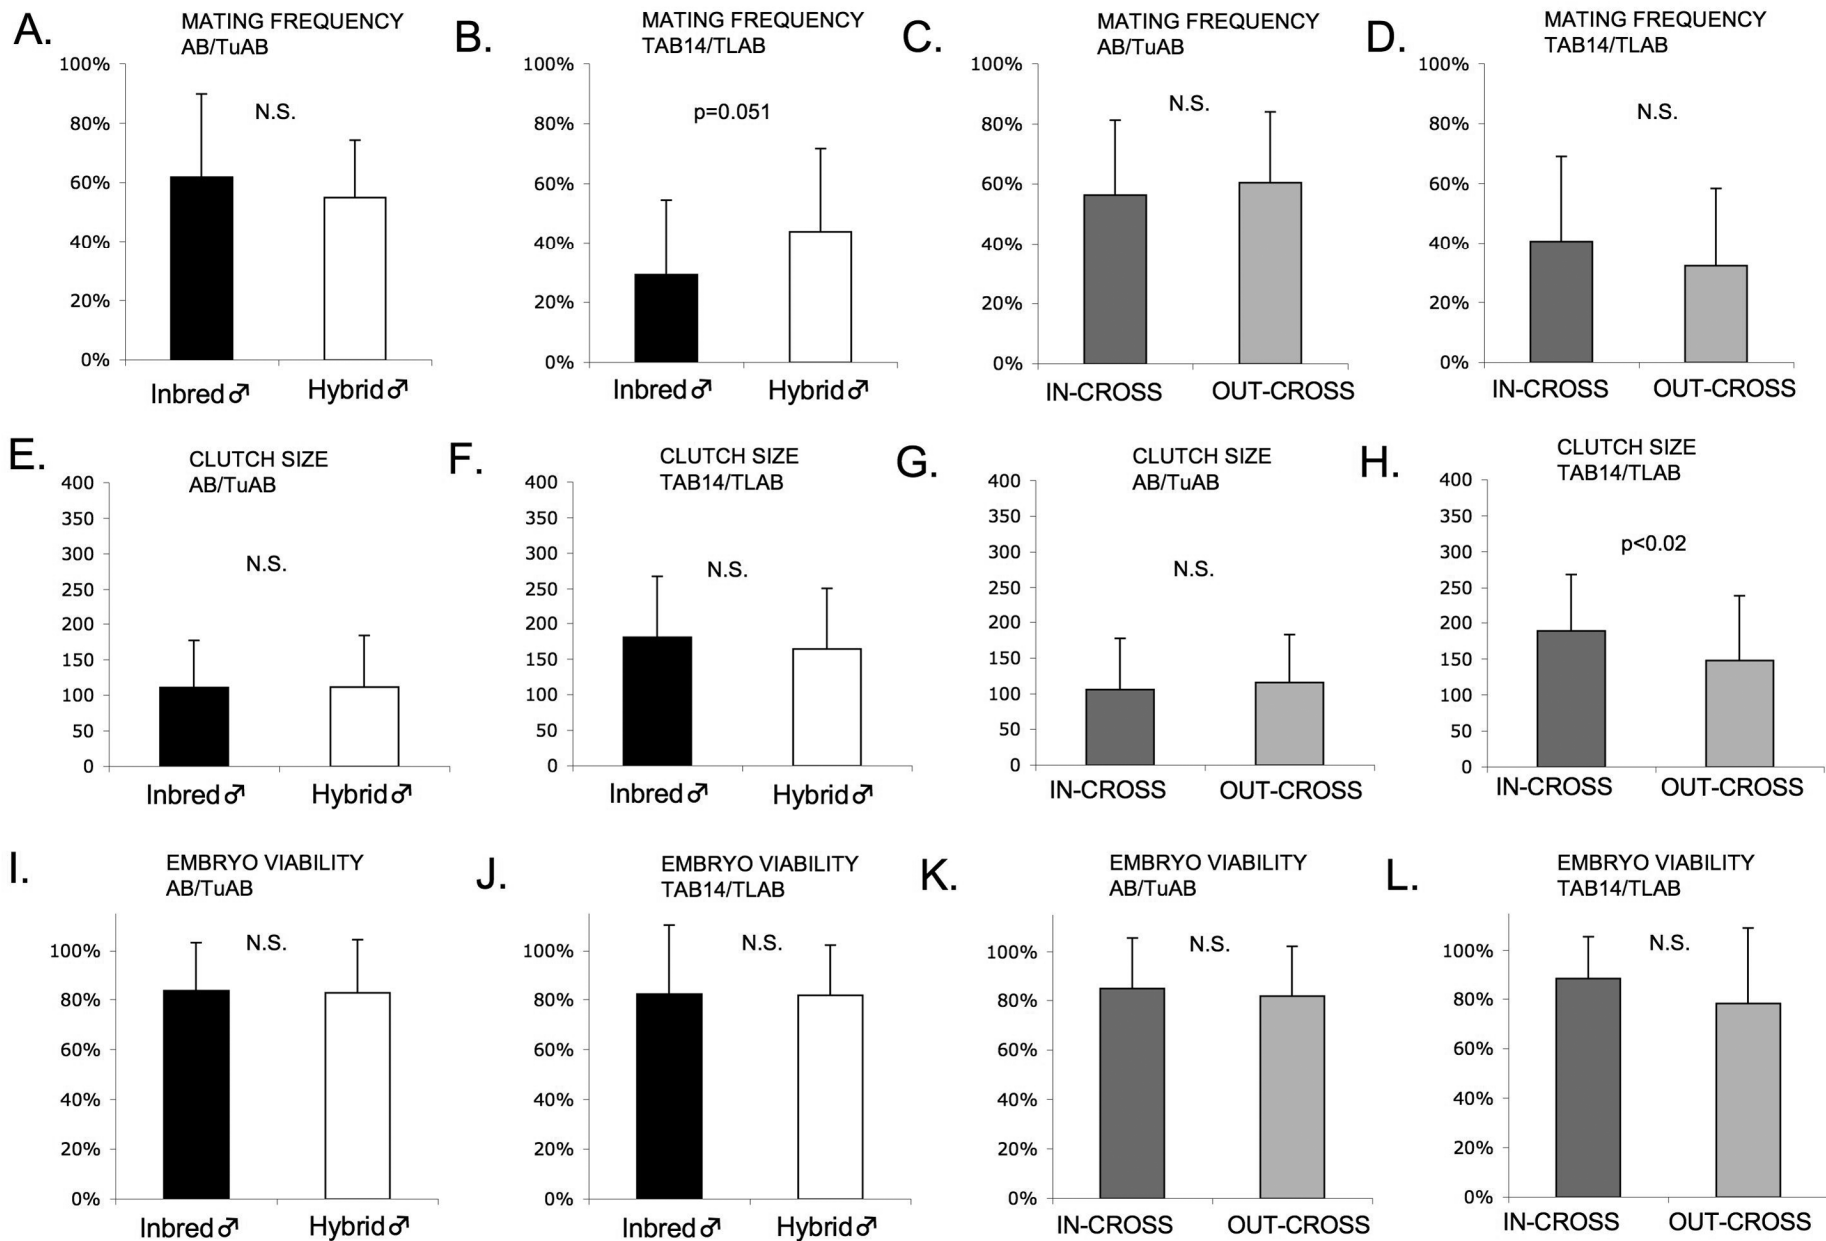

Supplement: NIHMS181816-supplement-supplement_1.pdf [file NIHMS181816-supplement-supplement_1.pdf]
